# Supplementary material for: A strategy to protect off-the-shelf cell therapy products using virus-specific T-cells engineered to eliminate alloreactive T-cells
Source: PubMed Central journal article supplement (PMC6657103; doi:10.1186/s12967-019-1988-y), 2019-07-24

**A**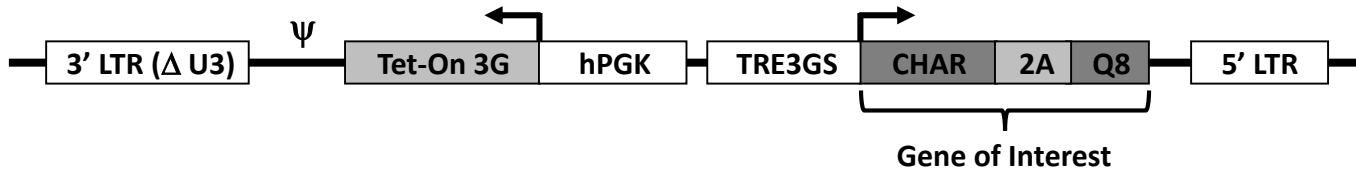**B**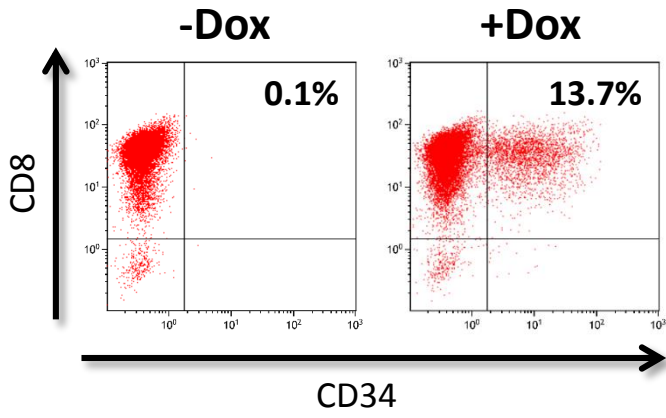

Supplement: 12967_2019_1988_MOESM1_ESM.pdf [file 12967_2019_1988_MOESM1_ESM.pdf]
