# Supplementary material for: A strategy to protect off-the-shelf cell therapy products using virus-specific T-cells engineered to eliminate alloreactive T-cells
Source: PubMed Central journal article supplement (PMC6657103; doi:10.1186/s12967-019-1988-y), 2019-07-24
Supplement: 12967_2019_1988_MOESM2_ESM.pdf [file 12967_2019_1988_MOESM2_ESM.pdf]

|                               |                                             |                           |                           |                           |
|-------------------------------|---------------------------------------------|---------------------------|---------------------------|---------------------------|
| <b>1<sup>st</sup><br/>MLR</b> | <b>Responder</b>                            | <b>PBMC</b>               | <b>PBMC</b>               | <b>PBMC</b>               |
|                               | <b>Stimulator</b>                           | <b>None</b>               | <b>NT CMVST</b>           | <b>iCHAR CMVST</b>        |
| <b>2<sup>nd</sup><br/>MLR</b> | <b>Responder</b>                            | <b>1<sup>st</sup> MLR</b> | <b>1<sup>st</sup> MLR</b> | <b>1<sup>st</sup> MLR</b> |
|                               | <b>Stimulator<br/>(Responder<br/>Donor)</b> | <b>PBMC</b>               | <b>PBMC</b>               | <b>PBMC</b>               |

**Gated on  
Responder  
T-cells**

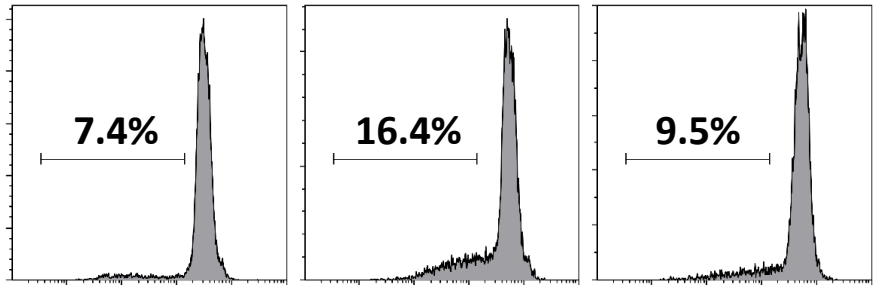

CellTrace Violet →
